# Supplementary material for: Cyclization Reactions Involving 2-Aminoarenetellurols and Derivatives of α,β-Unsaturated Carboxylic Acids
Source: Hindawi journal article supplement (doi:10.1155/2021/7140222), 2021-12-22
Supplement: f1 [file 7140222.f1.docx]

**Cyclization Reactions Involving 2-Aminoarenetellurols and Derivatives of α,β-Unsaturated Carboxylic Acids**

J. A. Patel, A. M. Lee, D. V. Franklin, F. R. Fronczek and T. Junk

**2,3-Dihydrobenzo[*b*][1,4]tellurazepin-4(5*H*)-one (1)**

**
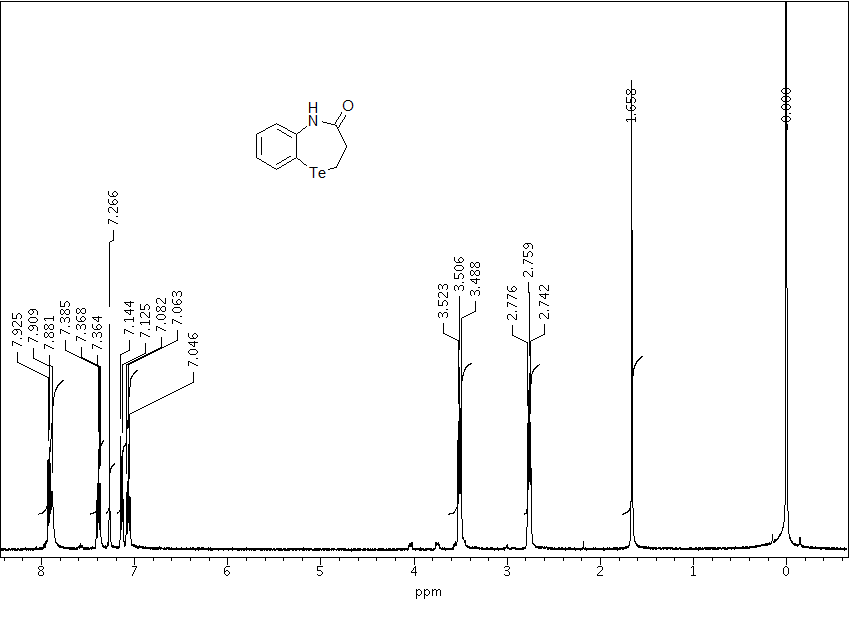
**

1HNMR spectrum of **1**, 400 MHz, CDCl3




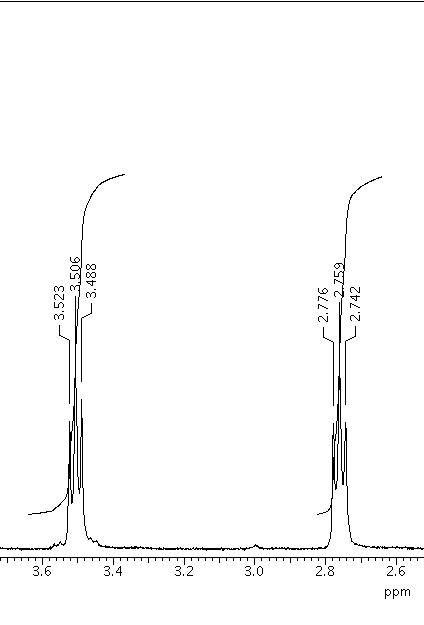


1HNMR spectrum of **1**, regions of interest





13CNMR spectrum of **1**, 400 MHz, CDCl3

**(R,S)-3-Methyl-2,3-dihydrobenzo[*b*][1,4]tellurazepin-4(5*H*)-one (2)**


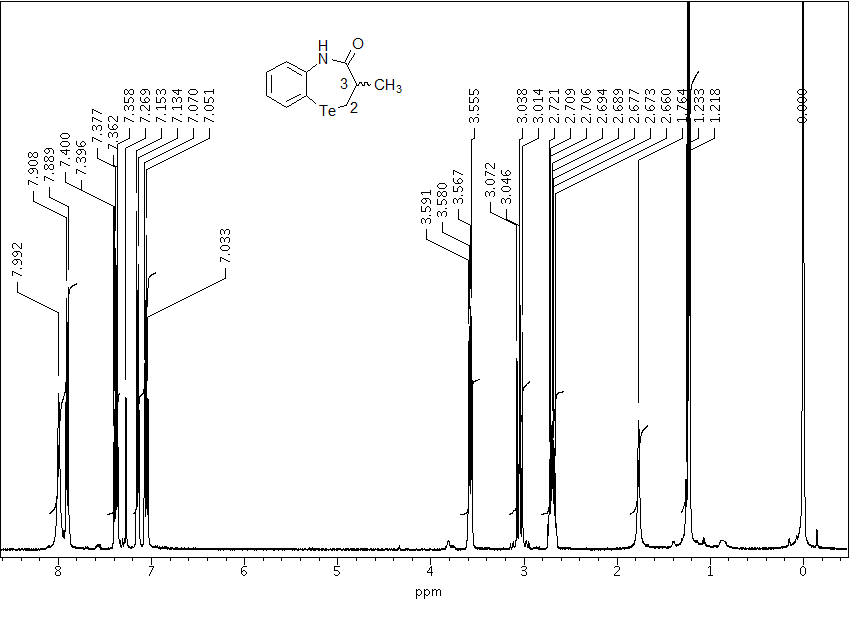


1HNMR spectrum of **2**, 400 MHz, CDCl3




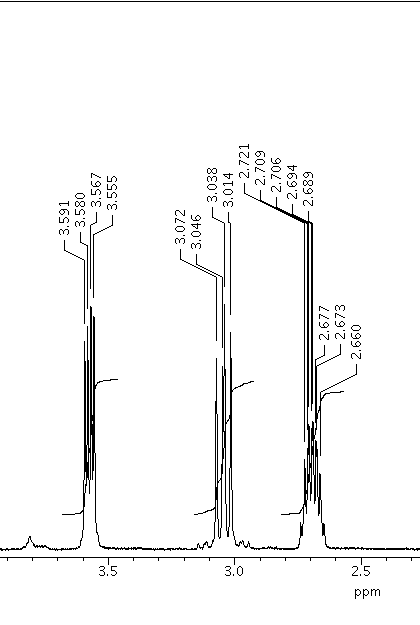


1HNMR spectrum of **2**, aromatic region and C2-C3 region showing diastereotopic splitting


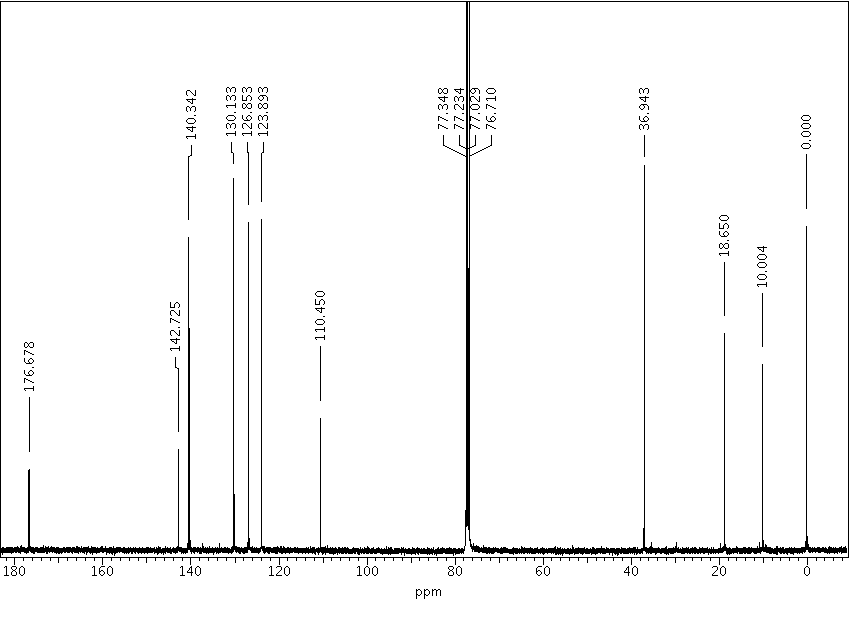


13CNMR spectrum of **2**, 400 MHz, CDCl3

**2-(2-Phenylethyl)benzo-1,3-tellurazole (3)**


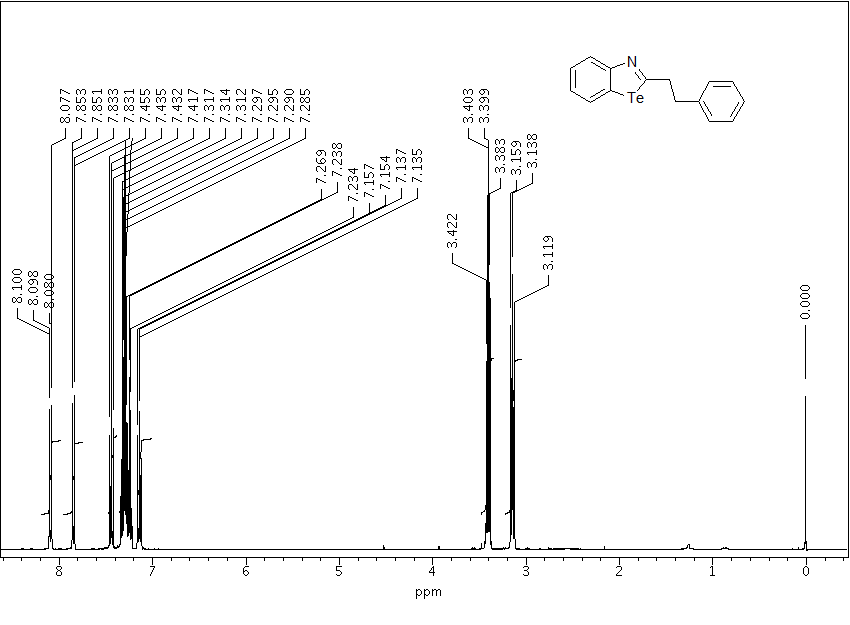


1HNMR spectrum of **3**, 400 MHz, CDCl3





1HNMR spectrum of **3**, aromatic region





13CNMR spectrum of **3**, 400 MHz, CDCl3

**Methyl (*Z*)-2-(5,7-dimethyl-3-oxo-3,4-dihydro-2*H*-benzo[*b*][1,4]tellurazin-2-ylidene)acetate (4)**


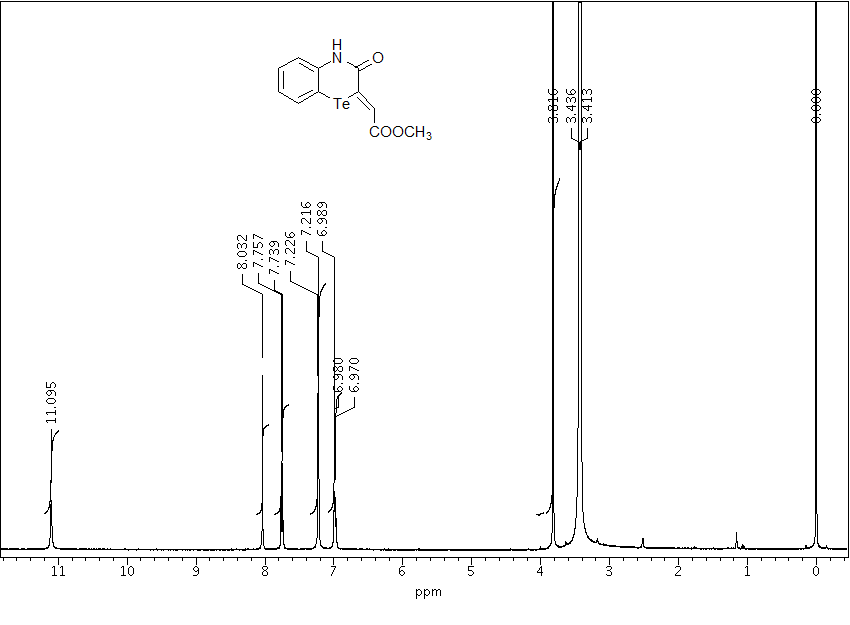


1HNMR spectrum of **4**, 400 MHz, CD3SOCD3





1HNMR spectrum of **4**, aromatic region





13CNMR spectrum of **4**, 400 MHz, CD3SOCD3

**(*Z*)-2-(3-Oxo-3,4-dihydro-2*H*-benzo[*b*][1,4]tellurazin-2-ylidene)acetic acid (5)**


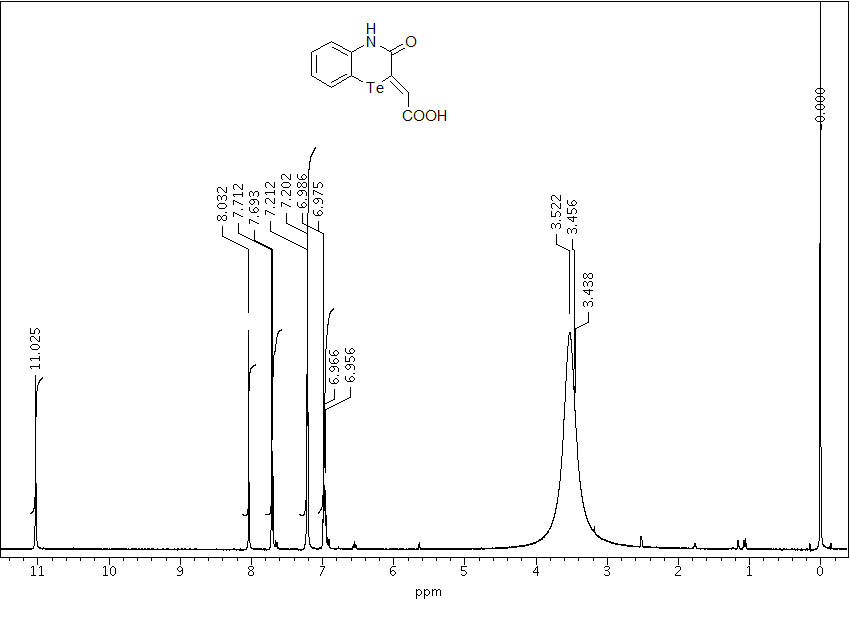


1HNMR spectrum of **5**, 400 MHz, CD3SOCD3


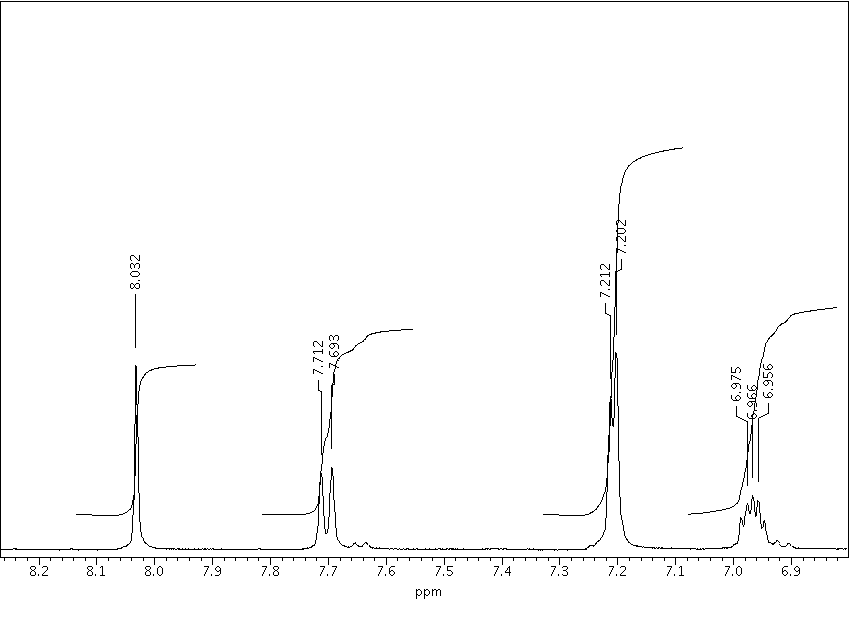


1HNMR spectrum of **5**, aromatic region


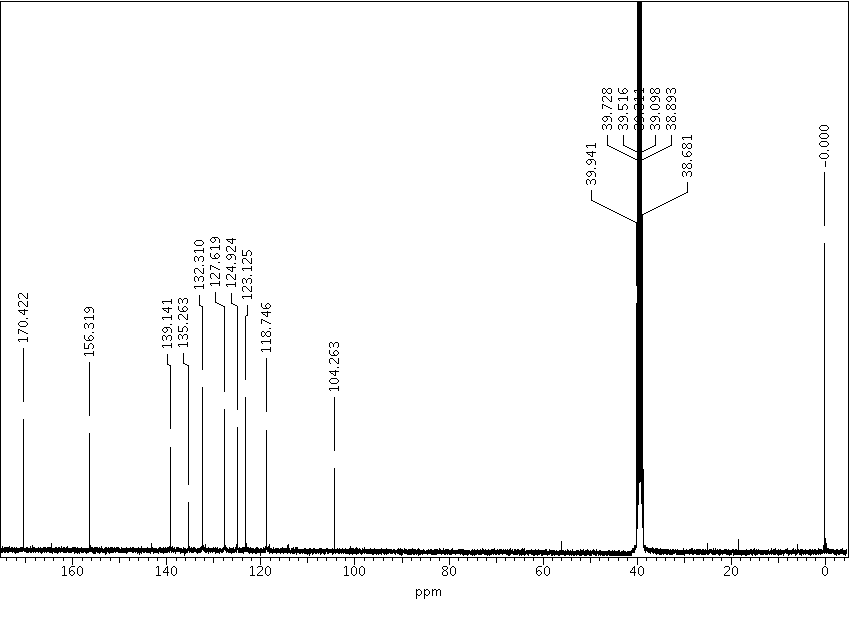


13CNMR spectrum of **5**, 400 MHz, CD3SOCD3

**Methyl (*Z*)-2-(2-oxo-1,2-dihydro-3*H*-naphtho[2,1-*b*][1,4]tellurazin-3-ylidene)acetate (6)**


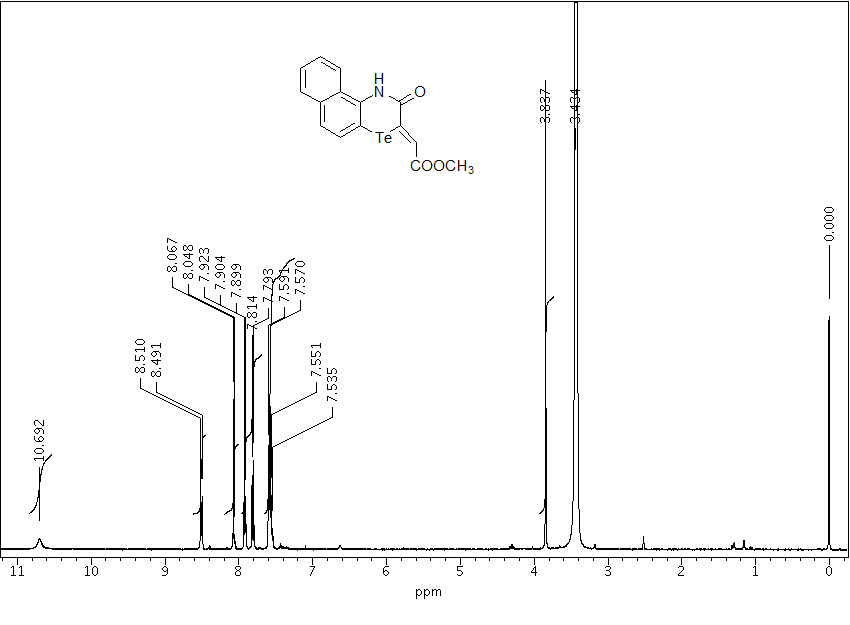


1HNMR spectrum of **6**, 400 MHz, CD3SOCD3


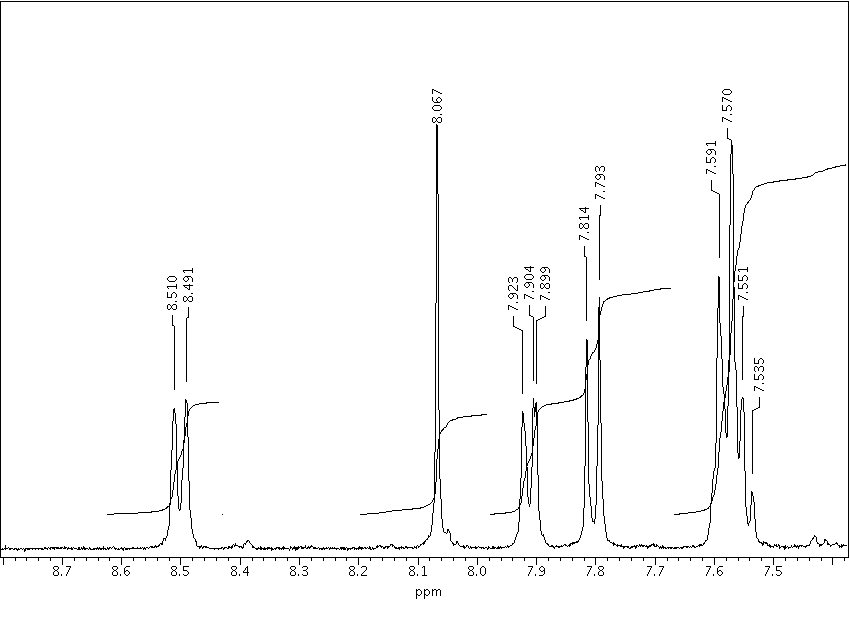


1HNMR spectrum of **6**, aromatic region


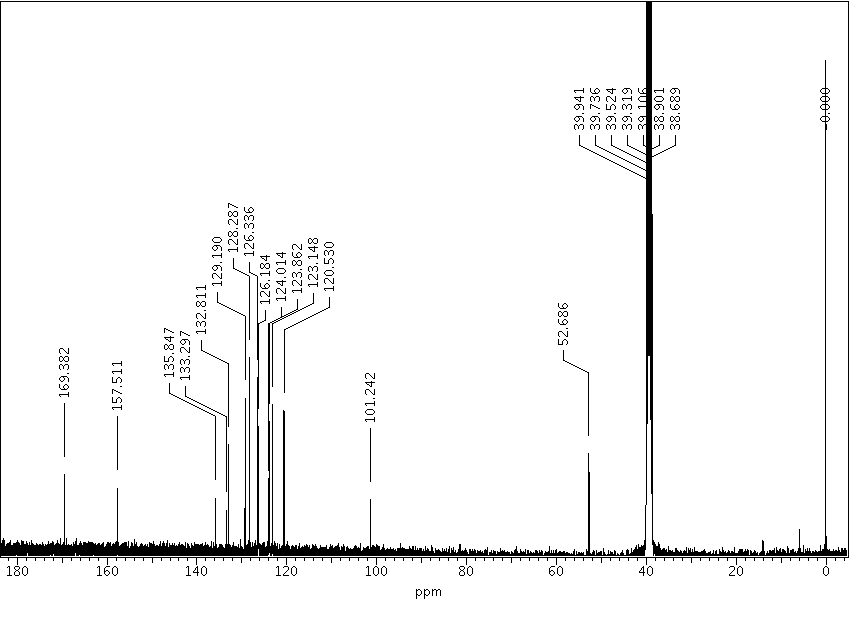


13CNMR spectrum of **5**, 400 MHz, CD3SOCD3
